# Supplementary material
Source: publisher figshare collection journal article supplement (https://acs.figshare.com/ndownloader/files/3710740)
Supplement: Supplementary file 1 [file 3710740]

# **Supramolecular Isomers of Metal-Organic Frameworks Derived from a Partially Flexible Ligand with Distinct Binding Motifs**

Rasha G. AbdulHalim, Aleksander Shkurenko, Mohamed H. Alkordi, and Mohamed Eddaoudi\*

Functional Materials Design, Discovery & Development Research Group (FMD<sup>3</sup>), Advanced Membranes & Porous Materials Center, Division of Physical Sciences and Engineering, King Abdullah University of Science and Technology (KAUST), Thuwal 23955-6900, Kingdom of Saudi Arabia

## **Table of Contents**

|              |                                          |    |
|--------------|------------------------------------------|----|
| <b>I -</b>   | Materials and Methods                    | 2  |
| <b>II-</b>   | Thermogravimetric Analysis               | 3  |
| <b>III-</b>  | Powder X-ray Diffraction (PXRD) Patterns | 5  |
| <b>VI-</b>   | Topological Analysis                     | 7  |
| <b>VII-</b>  | Single Crystal X-ray Diffraction Data    | 15 |
| <b>VIII-</b> | References                               | 16 |

## I- Materials and Methods

**Powder X-ray Diffraction (PXRD)** measurements were carried out at room temperature on a PANalytical X'Pert Pro diffractometer 45 kV, 40 mA for CuK $\alpha$  ( $\lambda = 1.5418 \text{ \AA}$ ), with a scan speed of  $1.0^\circ \text{ min}^{-1}$  and a step size of  $0.017^\circ$  in  $2\theta$ .

**Thermogravimetric analysis (TGA)** was performed on a TA Instrument Hi-Res TGA Q5000IR with High Resolution TGA (Hi-Res TGA) capability. Experiments were performed under N<sub>2</sub> atmosphere with balance and sample purge flow rates of  $10 \text{ ml min}^{-1}$  and  $25 \text{ ml min}^{-1}$ , respectively. Samples were placed on 100  $\mu\text{l}$  high temperature platinum crucibles and heated in Hi-Res TGA mode with a heating rate of  $5^\circ\text{C min}^{-1}$  and a resolution index of 4 and a sensitivity index of 1.

**Single Crystal X-ray Diffraction** The single crystal X-ray diffraction data for all structures were measured on a Bruker APEX2 equipped with a Cu K $\alpha$  INCOATEC Imus micro-focus source ( $\lambda = 1.54178 \text{ \AA}$ ). Indexing was performed using APEX2<sup>1</sup> (Difference Vectors method). Data integration and reduction were performed using SaintPlus 6.01.<sup>2</sup> Absorption correction was performed by multi-scan method implemented in SADABS.<sup>3</sup> Space groups were determined using XPREP implemented in APEX2. The structure was solved using SHELXS-97 (direct methods) and refined using SHELXL-2013<sup>4</sup> (full-matrix least-squares on  $F^2$ ) contained in APEX2,<sup>1, 4</sup> WinGX v1.70.01<sup>4-5</sup> and OLEX2<sup>4, 6</sup>.

## II- Thermogravimetric Analysis

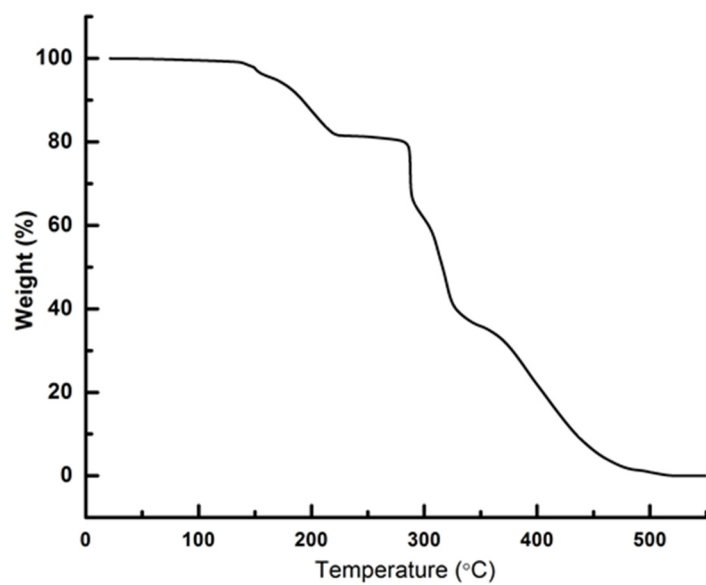

Figure S1. TGA for the as-synthesized 1.

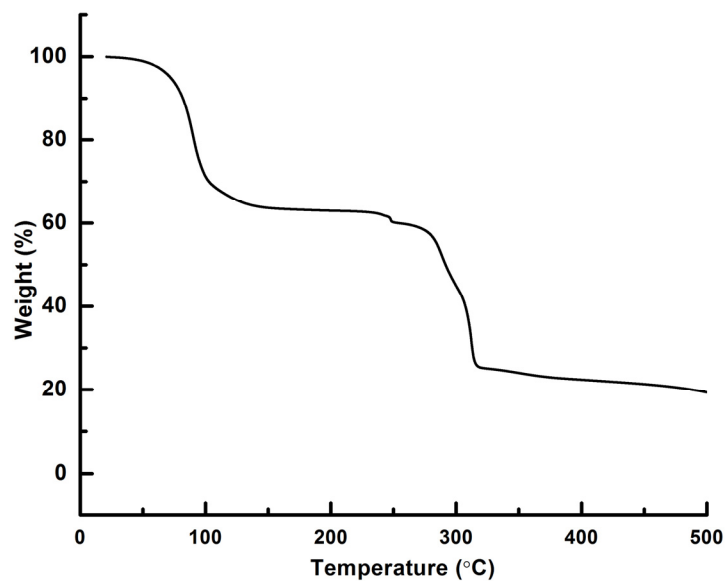

Figure S2. TGA for the as-synthesized 2.

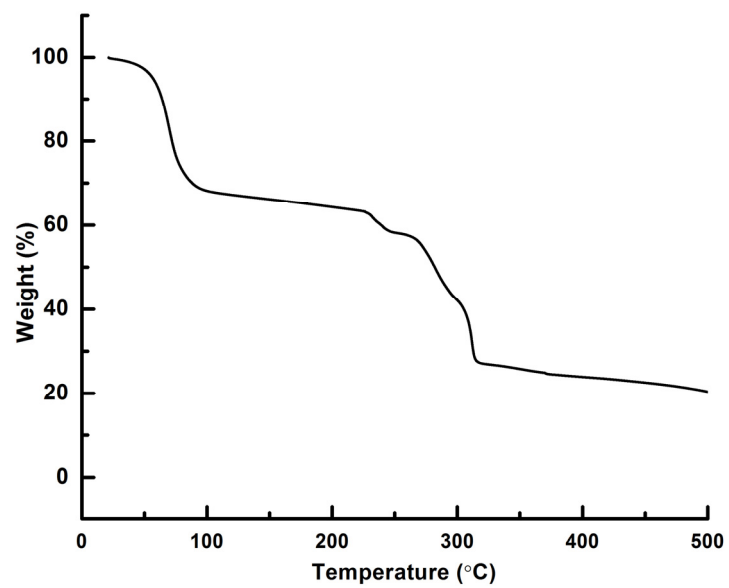

**Figure S3.** TGA for the as-synthesized **3**.

### III- Powder X-ray Diffraction (PXRD) Patterns

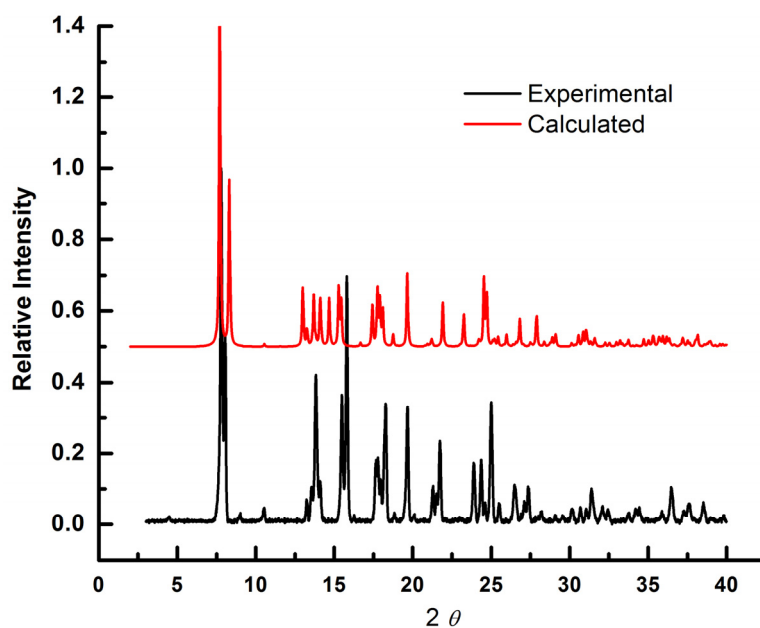

**Figure S4.** Comparison of the calculated and experimental PXRD patterns for **1**.

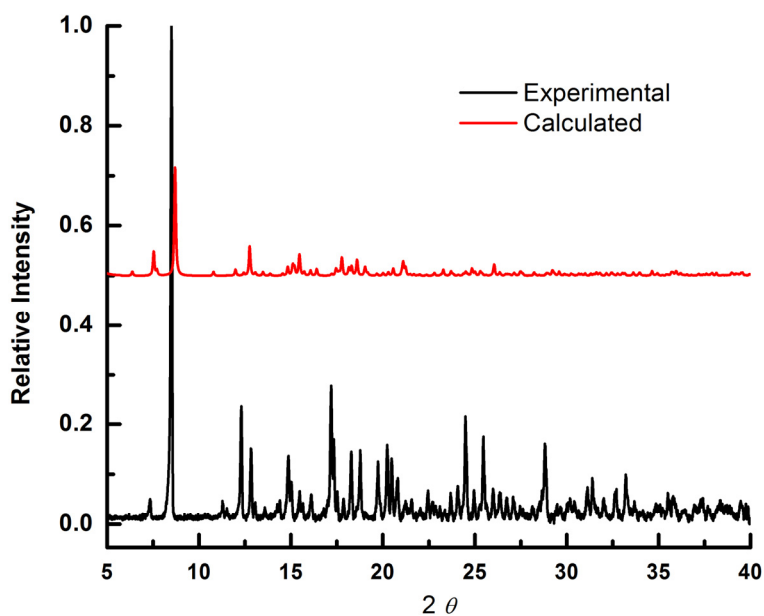

**Figure S5.** Comparison of the calculated and experimental PXRD patterns for **2**.

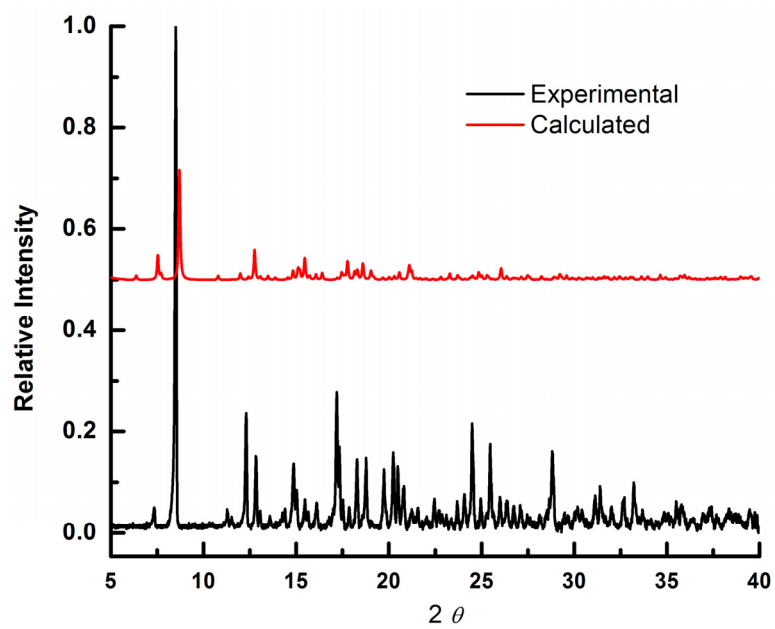

**Figure S6.** Comparison of the calculated and experimental PXRD patterns for **3**.

## VI- Topological Analysis:

### A. All points of extension considered for structures **2** and **3**

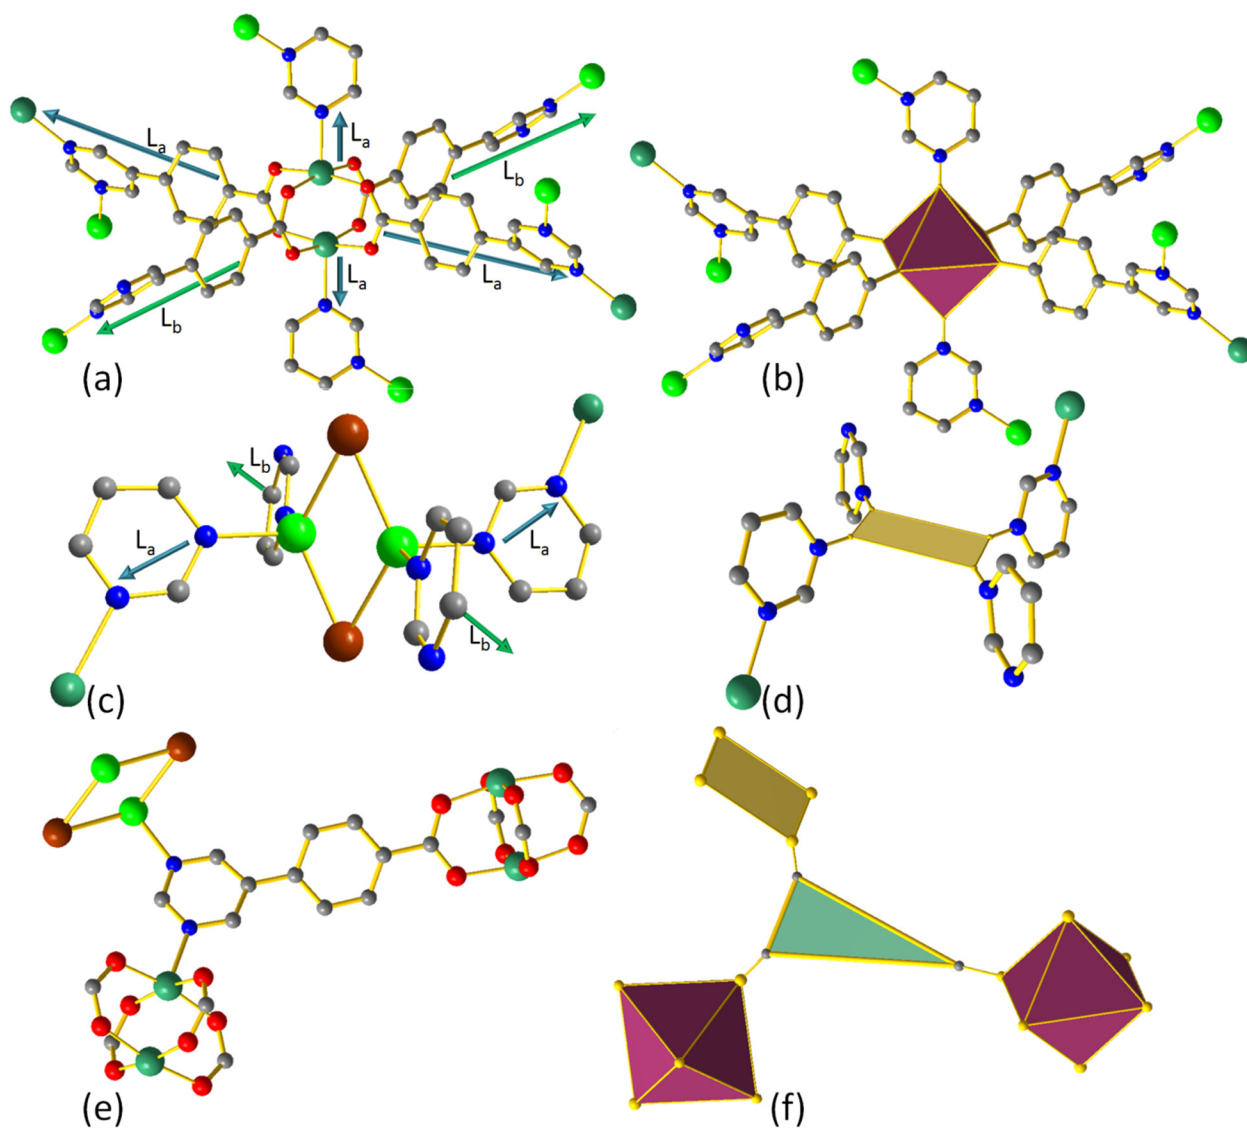

**Figure S7.** Schematic illustration of the MBBs and SBUs respectively: (a) and (b) representing 6-c paddlewheel, (c) and (d) representing 4-connected  $[\text{Cu}_2\text{I}_2(\text{N-})_4]$ , (e) and (f) representing coordination environment of the tritopic linker  $L_a$ . Color code (Cu(I) = bright green, Cu(II) = sea green, I = brown)

**B.** In the absence of the rhomboid dimer  $[\text{Cu}_2\text{I}_2]$

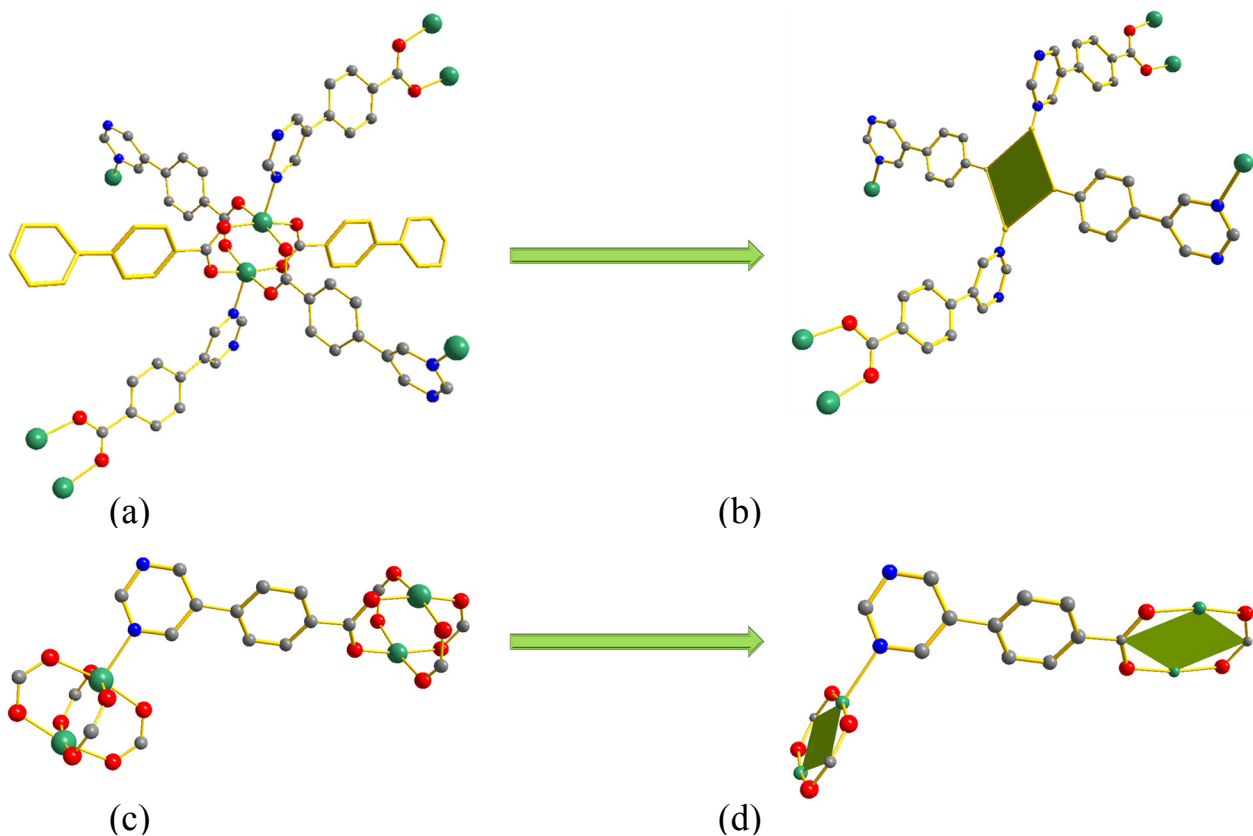

**Figure S8.** Schematic illustration of the MBBs and SBUs: (a) representing the coordination of the paddlewheel where  $L_b$  becomes a terminal ligand (highlighted in gold) and (b) paddle wheel is reduced to a 4-c building unit with lozenge geometry, (c) and (d)  $L_a$  becomes ditopic connecting 2 paddlewheels together. Color code (Cu(II) = sea green)



## C. Associated nets underlying topologies

### C.1. Structure 2

#### C.1.1. All points of extension considered

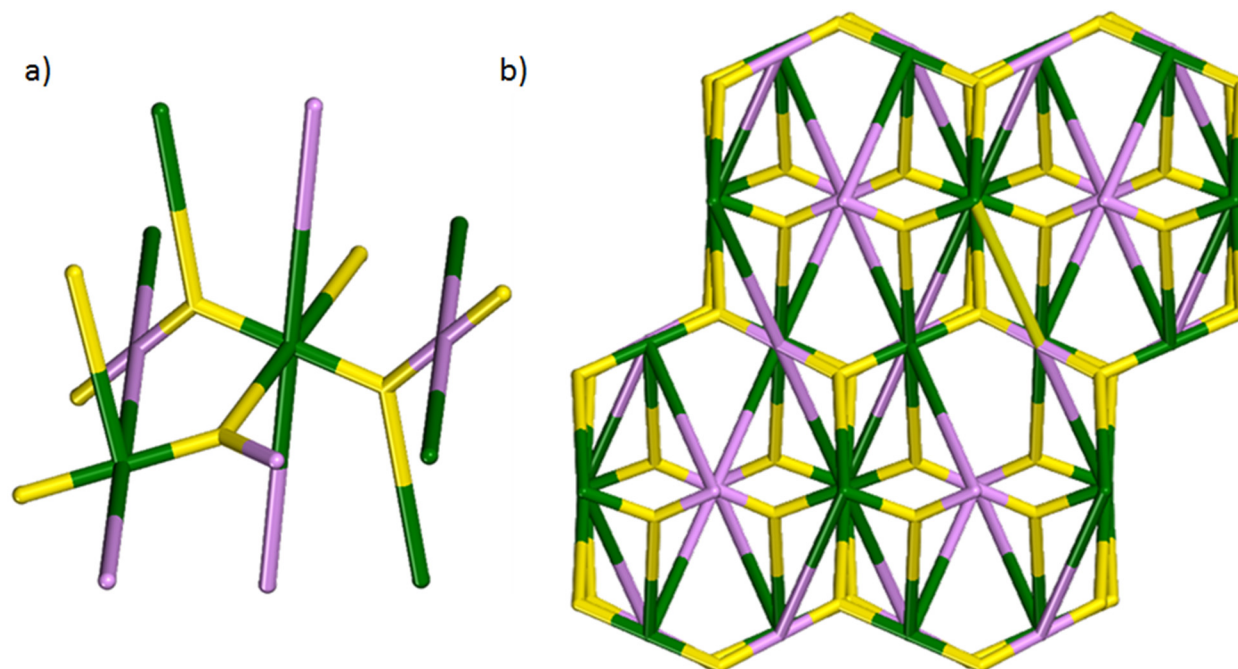

**Figure S9.** Topological analysis of **2**, a) each 6-c node (sea green) is connected to four 3-c nodes (yellow) and two 4-c nodes (lavender); b) illustration of (3,4,6)-connected net and its view along x-axis.

Prior to topological analysis, the structure has been simplified to its basic nodes (Figure S8). The two independent inorganic clusters (MBB-1 and MBB-2) are reduced to 6-connected and 4-connected nodes ( $\alpha$ ,  $\beta$ ), respectively, while the tritopic ligand is reduced to a 3-connected node ( $\gamma$ ). The topological analysis reveals that **2** exhibits a new (3,4,6)-connected topology.

Point symbol for net:  $\{5^2.6\}_2 \{5^2.7^3.8\} \{5^4.6^2.8^2.10\}$

(3,4,6)-c net with stoichiometry (3-c) 2 (4-c) (6-c); 3-nodal net, transitivity: [3443], new topology  
TD10 = 2521

Topological terms for each node:

( $\alpha$ ) Point symbol:  $\{5^4.6^2.7^6.8^2.10\}$

Extended point symbol:  $[5.5.5.5.6.6.7.7.7.7.7(3).7(3).8(2).8(2).10(6)]$

Coordination sequences: 6 14 40 74 130 208 320 440 624 782

( $\beta$ ) Point symbol:  $\{5^2.7^3.8\}$

Extended point symbol:  $[5.5.7(2).7(2).7(2).8(2)]$

Coordination sequences: 4 14 36 68 124 196 306 450 586 794

( $\gamma$ ) Point symbol:  $\{5^2.6\}$

Extended point symbol:  $[5.5.6]$ ,

Coordination sequences: 3 13 31 67 111 193 287 421 552 755

### C.1.2. Omitting the $[\text{Cu}_2\text{I}_2]$ connectivity

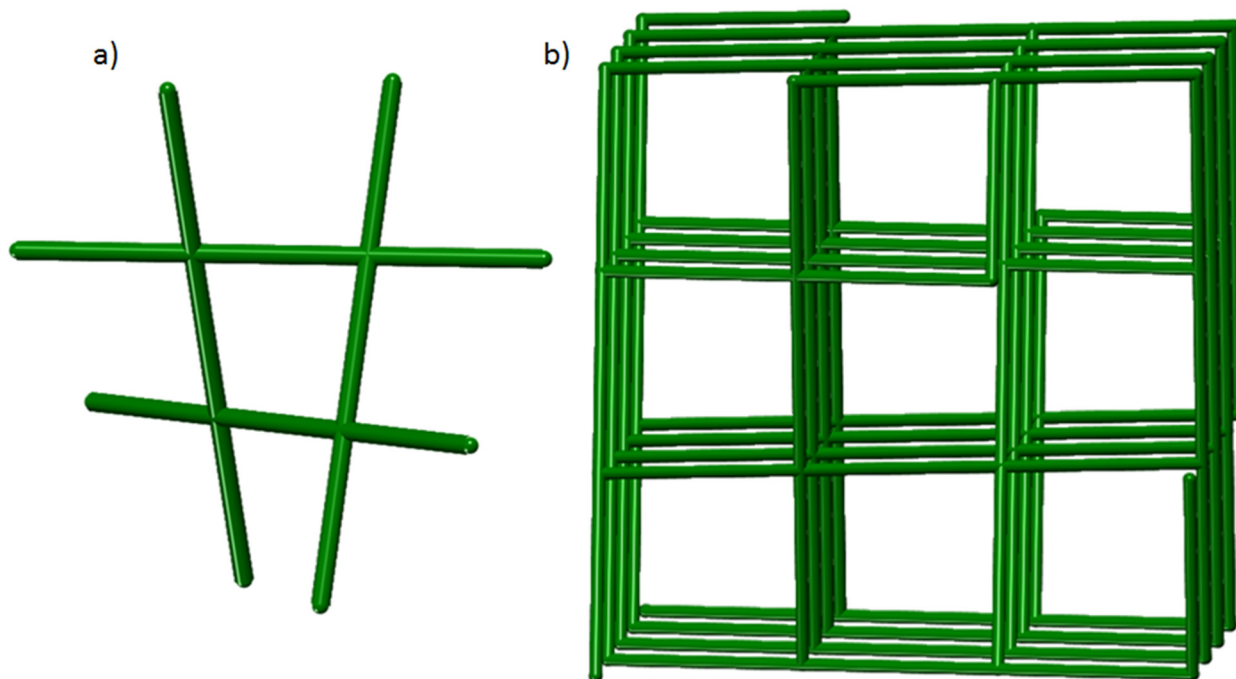

**Figure S10.** Topological analysis of **2** after eliminating MBB-2, (a) and (b) illustration of the unimodal net with **lvt** topology; each 4-c node (sea green) is connected to four 4-c nodes.

Prior to topological analysis, the structure has been simplified to its basic nodes (Figure S9). MBB-1 is reduced to a 4-connected node ( **$\alpha$** ). The topological analysis reveals that **2** exhibits **lvt** topology.  
Point symbol for net:  $\{4^2.8^4\}$

4-c net uninodal net, transitivity: [1121], **lvt** topology  
TD10 = 1127

Topological terms for each node:

( **$\alpha$** ) Point symbol:  $\{4^2.8^4\}$

Extended point symbol: [4.4.8(4).8(4).8(8).8(8)]

Coordination sequences: 4 10 24 44 72 104 144 188 240 296

## C.2. Structure 3

### C.2.1. All points of extension considered

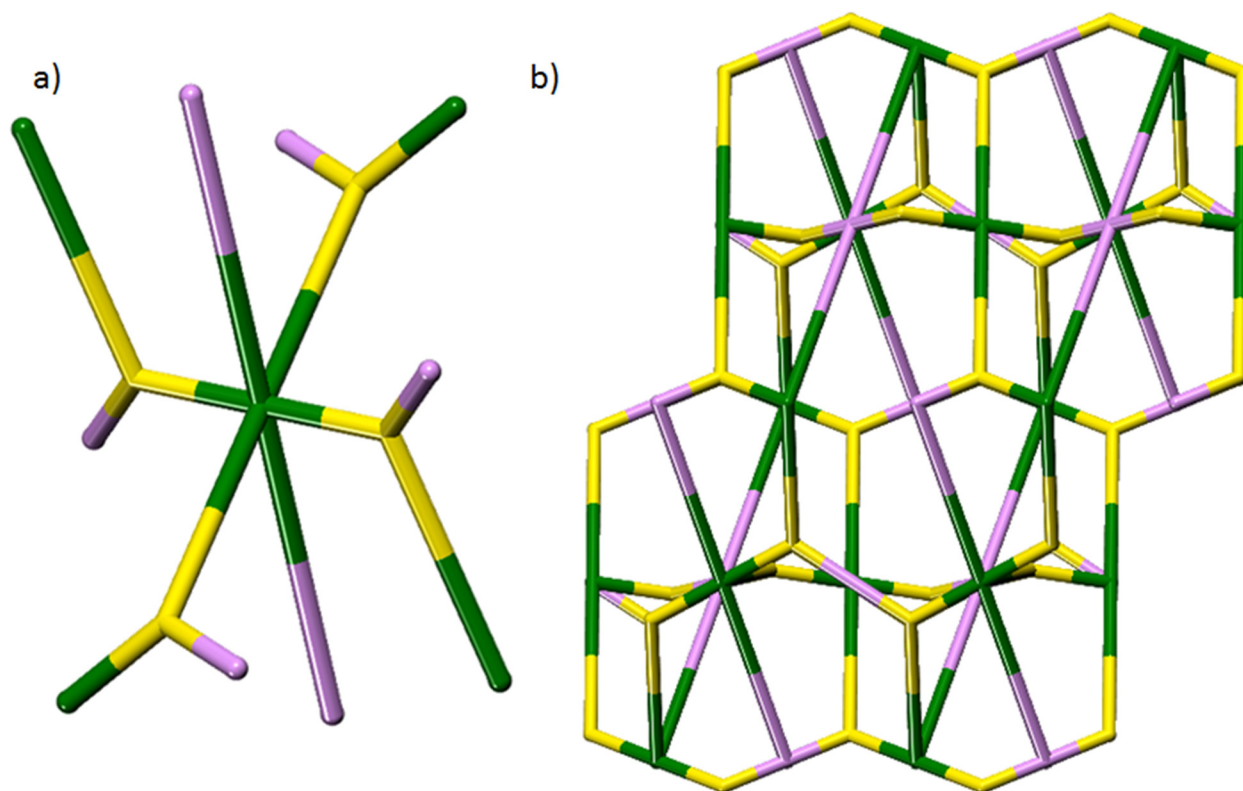

**Figure S11.** Topological analysis of **2**, a) each 6-c node (sea green) is connected to four 3-c nodes (yellow) and two 4-c nodes (lavender); b) illustration of (3,4,6)-connected net and its view along xz -plane.

Prior to topological analysis, the structure has been simplified to its basic nodes (Figure S9). The two independent inorganic clusters (MBB-1 and MBB-2) are reduced to 6-connected and 4-connected nodes ( $\alpha$ ,  $\beta$ ), respectively, while the tritopic ligand is reduced to a 3-connected node ( $\gamma$ ). The topological analysis reveals that **2** exhibits a new (3,4,6)-connected topology.

Point symbol for net:  $\{5^2.6\}2 \{5^2.7^3.8\} \{5^4.6^2.8^2.10\}$

(3,4,6)-c net with stoichiometry (3-c) 2 (4-c) (6-c); 3-nodal net, transitivity: [3432], new topology  
TD10 = 1923

Topological terms for each node:

( $\alpha$ ) Point symbol:  $\{5^8.6^2.8^4.9\}$

Extended point symbol:  $[5.5.5.5.5.5.5.8.8.6.6.8(2).8(4).9(2)]$

Coordination sequences: 6 14 34 62 114 170 252 334 448 556

( $\beta$ ) Point symbol:  $\{5^4.7.8\}$

Extended point symbol:  $[5.5.5.5.7(2).8(4)]$

Coordination sequences: 4 14 30 58 102 166 248 330 442 544

( $\gamma$ ) Point symbol:  $\{5^3\}$

Extended point symbol:  $[5.5.5(2)]$ ,

Coordination sequences: 3 13 26 58 98 161 232 326 417 547

### C.2.2. Omitting the [Cu<sub>2</sub>I<sub>2</sub>] connectivity

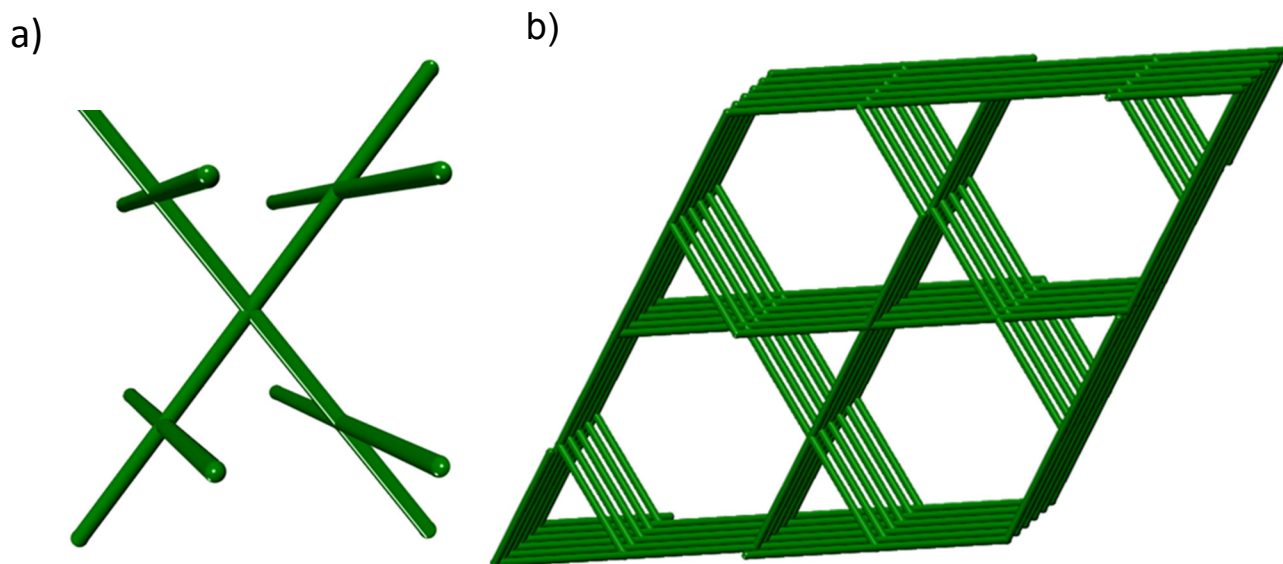

**Figure S12.** Topological analysis of **3** after eliminating MBB-2, (a) and (b) illustration of the unimodal net with **nbo** topology; each 4-c node (sea green) is connected to four 4-c nodes.

Prior to topological analysis, the structure has been simplified to its basic nodes (Figure S11). MBB-1 is reduced to a 4-connected node (**α**). The topological analysis reveals that **3** exhibits **nbo** topology.  
Point symbol for net: {6<sup>4</sup>.8<sup>2</sup>}

4-c net uninodal net, transitivity: [1121], **nbo** topology  
TD10 = 1169

Topological terms for each node:

(**α**) Point symbol: {6<sup>4</sup>.8<sup>2</sup>}

Extended point symbol: [6(2).6(2).6(2).6(2).8(6).8(6)]

Coordination sequences: 4 12 28 50 76 110 148 194 244 302

## VII- Single Crystal X-ray Diffraction Data

**Table S1. Crystal Structure Data for Compounds 1, 2 and 3.**

|                                                                                  | 1                                                                              | 2                                                                                                       | 3                                                                                                          |
|----------------------------------------------------------------------------------|--------------------------------------------------------------------------------|---------------------------------------------------------------------------------------------------------|------------------------------------------------------------------------------------------------------------|
| Empirical formula                                                                | C <sub>48</sub> H <sub>34</sub> Cu <sub>2</sub> N <sub>10</sub> O <sub>8</sub> | C <sub>66.13</sub> H <sub>88.89</sub> Cu <sub>4</sub> I <sub>2</sub> N <sub>15.38</sub> O <sub>20</sub> | C <sub>76.19</sub> H <sub>90.74</sub> Cu <sub>4</sub> I <sub>2</sub> N <sub>14.44</sub> O <sub>16.83</sub> |
| Formula weight                                                                   | 1005.93                                                                        | 1927.23                                                                                                 | 1986.09                                                                                                    |
| Crystal system                                                                   | Monoclinic                                                                     | Tetragonal                                                                                              | Trigonal                                                                                                   |
| Space group                                                                      | <i>P</i> 2 <sub>1</sub> / <i>c</i>                                             | <i>I</i> 4 <sub>1</sub> / <i>a</i>                                                                      | <i>R</i> -3                                                                                                |
| <i>a</i> (Å)                                                                     | 7.668(1)                                                                       | 34.018(3)                                                                                               | 40.463(5)                                                                                                  |
| <i>b</i> (Å)                                                                     | 13.624(2)                                                                      | 34.018(3)                                                                                               | 40.463(5)                                                                                                  |
| <i>c</i> (Å)                                                                     | 21.309(3)                                                                      | 15.308(1)                                                                                               | 15.710(2)                                                                                                  |
| $\alpha$ (°)                                                                     | 90                                                                             | 90                                                                                                      | 90                                                                                                         |
| $\beta$ (°)                                                                      | 93.599(7)                                                                      | 90                                                                                                      | 90                                                                                                         |
| $\gamma$ (°)                                                                     | 90                                                                             | 90                                                                                                      | 120                                                                                                        |
| Volume (Å <sup>3</sup> )                                                         | 2221.9(6)                                                                      | 17715(3)                                                                                                | 22275(6)                                                                                                   |
| <i>Z</i> , calculated density (g cm <sup>-3</sup> )                              | 2, 1.504                                                                       | 8, 1.445                                                                                                | 9, 1.333                                                                                                   |
| <i>F</i> (000)                                                                   | 1028                                                                           | 7803                                                                                                    | 9051                                                                                                       |
| Temperature (K)                                                                  | 100.0(1)                                                                       | 100.0(1)                                                                                                | 100.0(1)                                                                                                   |
| Radiation type                                                                   | Cu <i>K</i> $\alpha$                                                           | Cu <i>K</i> $\alpha$                                                                                    | Cu <i>K</i> $\alpha$                                                                                       |
| Absorption correction                                                            | Multi-scan                                                                     | Multi-scan                                                                                              | Multi-scan                                                                                                 |
| Absorption coefficient (mm <sup>-1</sup> )                                       | 1.75                                                                           | 7.14                                                                                                    | 6.38                                                                                                       |
| Crystal size (mm)                                                                | 0.03 × 0.06 × 0.09                                                             | 0.09 × 0.09 × 0.18                                                                                      | 0.09 × 0.09 × 0.24                                                                                         |
| Shape, color                                                                     | Block, clear light blue                                                        | Tetragonal bipyramid, light green                                                                       | Trigonal antiprism, clear light green                                                                      |
| $\theta$ range for data collection (°)                                           | 3.9–63.7                                                                       | 4.1–66.9                                                                                                | 6.2–67.5                                                                                                   |
|                                                                                  | -8 > <i>h</i> > 8                                                              | -40 > <i>h</i> > 40                                                                                     | -45 > <i>h</i> > 41                                                                                        |
| Limiting indices                                                                 | -15 > <i>k</i> > 14                                                            | -29 > <i>k</i> > 39                                                                                     | -44 > <i>k</i> > 41                                                                                        |
|                                                                                  | -24 > <i>l</i> > 18                                                            | -17 > <i>l</i> > 18                                                                                     | -17 > <i>l</i> > 17                                                                                        |
| Reflection collected / unique / observed with <i>I</i> > 2 $\sigma$ ( <i>I</i> ) | 11167 / 3509 / 3280                                                            | 90211 / 7746 / 7326                                                                                     | 25823 / 7515 / 7278                                                                                        |
| <i>R</i> <sub>int</sub>                                                          | 0.025                                                                          | 0.068                                                                                                   | 0.031                                                                                                      |
| Refinement method                                                                | Full-matrix least-squares on <i>F</i> <sup>2</sup>                             | Full-matrix least-squares on <i>F</i> <sup>2</sup>                                                      | Full-matrix least-squares on <i>F</i> <sup>2</sup>                                                         |
| Data / restraints / parameters                                                   | 3509 / 0 / 308                                                                 | 88061 / 106 / 511                                                                                       | 7515 / 132 / 587                                                                                           |
| Final <i>R</i> indices [ <i>I</i> > 2 $\sigma$ ( <i>I</i> )]                     | <i>R</i> <sub>1</sub> = 0.031, <i>wR</i> <sub>2</sub> = 0.085                  | <i>R</i> <sub>1</sub> = 0.063, <i>wR</i> <sub>2</sub> = 0.152                                           | <i>R</i> <sub>1</sub> = 0.042, <i>wR</i> <sub>2</sub> = 0.108                                              |
| Final <i>R</i> indices (all data)                                                | <i>R</i> <sub>1</sub> = 0.033, <i>wR</i> <sub>2</sub> = 0.086                  | <i>R</i> <sub>1</sub> = 0.072, <i>wR</i> <sub>2</sub> = 0.155                                           | <i>R</i> <sub>1</sub> = 0.043, <i>wR</i> <sub>2</sub> = 0.109                                              |
| Weighting scheme                                                                 | [ $\sigma^2(F_o^2) + (0.0491P)^2 + 1.8134P$ ] <sup>-1</sup>                    | [ $\sigma^2(F_o^2) + (0.0535P)^2 + 332.3661P$ ] <sup>-1</sup>                                           | [ $\sigma^2(F_o^2) + (0.0522P)^2 + 192.9264P$ ] <sup>-1</sup>                                              |
| Goodness-of-fit                                                                  | 1.05                                                                           | 1.05                                                                                                    | 1.02                                                                                                       |
| Largest diff. peak/hole / e Å <sup>-3</sup>                                      | 0.46/-0.39                                                                     | 1.18/-1.13                                                                                              | 1.28 / -1.26                                                                                               |

## VIII- References

1. Inc, B. A. *APEX2 (Version 2013.6-2)*, Bruker AXS Inc: Madison, Wisconsin, USA, 2013.
2. Bruker *SAINT-V8.32A*, Bruker AXS. Inc: Madison, Wisconsin, USA, 2013.
3. Sheldrick, G. M. *SADABS*, University of Gottingen, Germany, 1996.
4. Sheldrick, G. M. *Acta Crystallogr. Sect. A* **2008**, *64*, 112-122.
5. (a) Farrugia, L. *J. Appl. Crystallogr.* **1999**, *32* (4), 837-838; (b) Sheldrick, G. M. *SHELXL-97*, 1997; (c) Sheldrick, G. M. *Acta Crystallogr. Sect. A* **1990**, *46*, 467-473.
6. Dolomanov, O. V.; Bourhis, L. J.; Gildea, R. J.; Howard, J. A. K.; Puschmann, H. *J. Appl. Crystallogr.* **2009**, *42*, 339-341.
